# Supplementary material
Source: Elsevier journal article supplement (https://www.sciencedirect.com/science/article/pii/S2254887421001697)
Supplement: mmc1 [file S2254887421001697:mmc1.pdf]

Supplementary Table 1 Demographics of the general Chinese adult population aged 20 years or older in 2015, and risk factors for COPD, by GOLD stage

[illegible]

|                                                     |                |              |              |            |           |          |                 |              |              |           |           |          |                 |
|-----------------------------------------------------|----------------|--------------|--------------|------------|-----------|----------|-----------------|--------------|--------------|-----------|-----------|----------|-----------------|
|                                                     | Never          | 771 (31.2%)  | 720 (93.4%)  | 33 (4.3%)  | 16 (2.1%) | 2 (0.2%) | <0.01           | 3072 (97.0%) | 2963 (96.5%) | 74 (2.4%) | 30 (1%)   | 5 (0.2%) | <0.001          |
|                                                     | Former smoker  | 1468 (59.5%) | 1314 (89.5%) | 102 (6.9%) | 44 (3%)   | 8 (0.5%) |                 | 72 (2.3%)    | 63 (87.5%)   | 7 (9.7%)  | 2 (2.8%)  | 0 (0%)   |                 |
|                                                     | Current smoker | 229 (9.3%)   | 194 (84.7%)  | 23 (10%)   | 10 (4.4%) | 2 (0.9%) |                 | 24 (0.8%)    | 19 (79.2%)   | 1 (4.2%)  | 3 (12.5%) | 1 (4.2%) |                 |
| Passive smoking at home                             |                |              |              |            |           |          |                 |              |              |           |           |          |                 |
|                                                     | Yes            | 1838 (74.5%) | 1662 (90.4%) | 118 (6.4%) | 51 (2.8%) | 7 (0.4%) | <i>p</i> =0.778 | 3072 (97.0%) | 2963 (96.5%) | 74 (2.4%) | 30 (1%)   | 5 (0.2%) | <i>p</i> =0.866 |
|                                                     | No             | 602 (24.4%)  | 542 (90%)    | 38 (6.3%)  | 18 (3%)   | 4 (0.7%) |                 | 96 (3.0%)    | 82 (85.4%)   | 8 (8.3%)  | 5 (5.2%)  | 1 (1%)   |                 |
| Smoking exposure (pack years)                       |                |              |              |            |           |          |                 |              |              |           |           |          |                 |
|                                                     | 0              | 803 (32.5%)  | 662 (82.4%)  | 86 (10.7%) | 47 (5.9%) | 8 (1%)   | <0.001          | 32 (1.0%)    | 24 (75%)     | 1 (2.8%)  | 2 (6.2%)  | 1 (3.1%) | <0.001          |
|                                                     | 1~9            | 471 (19.1%)  | 456 (96.8%)  | 10 (2.1%)  | 4 (0.8%)  | 1 (0.2%) |                 | 36 (1.1%)    | 32 (88.9%)   | 2 (11.1%) | 3 (8.3%)  | 0 (0%)   |                 |
|                                                     | 10~19          | 310 (12.6%)  | 282 (91%)    | 25 (8.1%)  | 3 (1%)    | 0 (0%)   |                 | 18 (0.6%)    | 16 (88.9%)   | 74 (2.4%) | 0 (0%)    | 1 (0%)   |                 |
|                                                     | ≥20            | 884 (35.8%)  | 828 (93.7%)  | 37 (4.2%)  | 16 (1.8%) | 3 (0.3%) |                 | 3082 (97.3%) | 2973 (96.5%) | 82 (2.6%) | 30 (1%)   | 5 (0.2%) |                 |
| Smokers living in the home                          |                |              |              |            |           |          |                 |              |              |           |           |          |                 |
|                                                     | 0              | 1460 (59.2%) | 1320 (90.4%) | 91 (6.2%)  | 40 (2.7%) | 9 (0.6%) | <i>p</i> =0.704 | 1275 (40.2%) | 1234 (96.8%) | 28 (2.2%) | 12 (0.9%) | 1 (0.1%) | <i>p</i> =0.255 |
|                                                     | 1              | 846 (34.3%)  | 759 (89.7%)  | 60 (7.1%)  | 26 (3.1%) | 1 (0.1%) |                 | 1641 (51.8%) | 1572 (95.8%) | 44 (2.7%) | 21 (1.3%) | 4 (0.2%) |                 |
|                                                     | ≥2             | 157 (6.4%)   | 144 (91.7%)  | 7 (4.5%)   | 4 (2.5%)  | 2 (1.3%) |                 | 242 (7.6%)   | 230 (95%)    | 9 (3.7%)  | 2 (0.8%)  | 1 (0.4%) |                 |
| Chronic cough during childhood (age≤14 years)       |                |              |              |            |           |          |                 |              |              |           |           |          |                 |
|                                                     | Frequent       | 55 (2.2%)    | 43 (78.2%)   | 5 (9.1%)   | 6 (10.9%) | 1 (1.8%) | 0.011           | 118 (3.7%)   | 101 (85.6%)  | 9 (7.6%)  | 7 (5.9%)  | 1 (0.8%) | <0.001          |
|                                                     | Sometimes      | 181 (7.3%)   | 163 (90.1%)  | 10 (5.5%)  | 6 (3.3%)  | 2 (1.1%) |                 | 214 (6.8%)   | 204 (95.3%)  | 6 (2.8%)  | 3 (1.4%)  | 1 (0.5%) |                 |
|                                                     | Rare           | 2225 (90.2%) | 2016 (90.6%) | 143 (6.4%) | 57 (2.6%) | 9 (0.4%) |                 | 2827 (89.2%) | 2731 (96.6%) | 67 (2.4%) | 25 (0.9%) | 4 (0.1%) |                 |
| History of pneumonia or bronchitis during childhood |                |              |              |            |           |          |                 |              |              |           |           |          |                 |
|                                                     | Yes            | 147 (6.0%)   | 129 (87.7%)  | 8 (5.4%)   | 7 (4.8%)  | 3 (2%)   | <i>p</i> =0.014 | 202 (6.4%)   | 182 (90.1%)  | 8( 4%)    | 10 (5%)   | 2 (1%)   | <0.001          |

|                                          |           |              |              |              |              |              |          |              |              |              |              |              |         |         |
|------------------------------------------|-----------|--------------|--------------|--------------|--------------|--------------|----------|--------------|--------------|--------------|--------------|--------------|---------|---------|
|                                          | No        | 1981 (80.3%) | 1805 (91.1%) | 122 (6.2%)   | 49 (2.5%)    | 5( 0.3%)     |          | 2575 (81.3%) | 2489 (96.7%) | 64 (2.5%)    | 20 (0.8%)    | 2 (0.1%)     |         |         |
|                                          | Unknown   | 337 (13.7%)  | 291 (86.4%)  | 28 (8.3%)    | 14 (4.2%)    | 4 (1.2%)     |          | 385 (12.2%)  | 368 (95.6%)  | 10 (2.6%)    | 5 (1.3%)     | 2 (0.5%)     |         |         |
| Parental history of respiratory diseases |           | 2468 (100%)  | 2228 (0.3%)  | 158 (6.4%)   | 70 (2.8%)    | 12 (0.4%)    | p=0.422  | 3168 (100%)  | 3045 (96.1%) | 82 (2.6%)    | 35 (1.1%)    | 6 (0.2%)     | p=0.242 |         |
| History of spirometry test               |           |              |              |              |              |              |          |              |              |              |              |              |         |         |
|                                          | Yes       | 2441 (98.9%) | 2206 (90.4%) | 153 (6.3%)   | 70 (2.9%)    | 11 (0.5%)    | p=1.000  | 3131 (98.8%) | 3010 (96.1%) | 80 (2.6%)    | 35 (1.1%)    | 6 (0.2%)     | p=0.197 |         |
|                                          | No        | 11 (0.4%)    | 10 (90.9%)   | 1 (9.1%)     | 0 (0%)       | 0 (0%)       |          | 21 (0.7%)    | 19 (90.5%)   | 2 (9.5%)     | 0 (0%)       | 0 (0%)       |         |         |
| BMI (kg/m <sup>2</sup> )                 |           | 25.16 (3.78) | 25.20 (3.75) | 24.82 (4.25) | 25.19 (3.80) | 22.70 (3.07) |          | 24.61 (3.78) | 24.61 (3.78) | 24.33 (3.02) | 25.55 (4.50) | 26.46 (5.02) |         |         |
|                                          | <18.5     | 58           | 54 (93.1%)   | 2 (3.4%)     |              | 0            | 2 (3.4%) | p=0.001      | 103          | 99 (96.1%)   | 3 (2.9%)     | 1 (1.0%)     | 0       | p=0.300 |
|                                          | 18.5~24.9 | 1176         | 1044 (88.8%) | 93 (7.9%)    | 31 (2.6%)    | 8 (0.7%)     |          | 1683         | 1623 (96.4%) | 41 (2.4%)    | 16 (1.0)     | 3 (0.2%)     |         |         |
|                                          | 25.0~29.9 | 987          | 903 (91.5%)  | 48 (4.9%)    | 34 (3.4%)    | 2 (0.2)      |          | 1126         | 1074 (95.4%) | 35 (3.1%)    | 16 (1.4)     | 1 (0.1%)     |         |         |
|                                          | ≥30       | 247          | 227 (91.9%)  | 15 (6.1%)    | 5 (2.0)      |              | 0        | 256          | 249 (97.3%)  | 3 (1.2%)     | 2 (0.8)      | 2 (0.8%)     |         |         |
| Biomass use                              |           |              |              |              |              |              |          |              |              |              |              |              |         |         |
|                                          | Yes       | 134 (5.6%)   | 118 (5.5%)   | 11 (7.2%)    | 5(7.4%)      | 0 (0)        | p=0.768  | 184 (6.0%)   | 172 (5.9%)   | 11 (13.8%)   | 1 (3.1%)     |              | 0       | p=0.024 |
|                                          | No        | 2254 (94.4%) | 2040 (94.5%) | 141 (92.8%)  | 63 (92.6%)   | 10 (100)     |          | 2864 (94.0%) | 2758 (94.1%) | 69 (86.2%)   | 31 (96.2%)   | 6 (100.00)   |         |         |
| Annual mean PM2.5 exposure (µg/M2)       |           | 68.07 (4.39) | 68.04 (4.37) | 68.23 (4.62) | 68.98 (4.37) | 66.18 (4.67) | P=0.039  | 67.99 (4.35) | 67.99 (4.35) | 66.74 (4.42) | 68.64 (4.60) | 65.17 (4.13) | p=0.773 |         |
|                                          | <50       | 0            |              | 0            |              | 0            |          | 0            |              | 0            |              | 0            |         | 0       |
|                                          | 50~74     | 2270 (92.0)  | 2060 (90.7)  | 138 (6.1)    | 60 (2.6)     | 11 (0.5)     | p=0.012  | 2808 (88.6)  | 2700 (96.2)  | 71 (2.5)     | 31 (3.1)     | 6 (0.2)      | p=0.771 |         |
|                                          | ≥75       | 198 (8.0)    | 168 (84.8)   | 20 (10.1)    | 10 (5.1)     |              | 0        | 360 (11.4)   | 345 (95.8)   | 11 (3.1)     | 4 (1.1)      |              | 0       |         |
| FEV1 (L) (%)                             |           | 3.39 (0.71)  | 3.49 (0.64)  | 2.86 (0.53)  | 1.96 (0.43)  | 1.06 (0.17)  | <0.001   | 2.48 (0.48)  | 2.48 (0.48)  | 2.08 (0.44)  | 1.34 (0.34)  | 0.94 (0.38)  | <0.001  |         |

|                                                   |     |              |              |              |              |              |                 |              |              |              |              |               |                 |
|---------------------------------------------------|-----|--------------|--------------|--------------|--------------|--------------|-----------------|--------------|--------------|--------------|--------------|---------------|-----------------|
| <b>FVC (L) (%)</b>                                |     | 4.35 (0.78)  | 4.38 (0.76)  | 4.46 (0.78)  | 3.50 (0.72)  | 2.62 (0.46)  | <0.001          | 3.08 (0.54)  | 3.08 (0.54)  | 3.13 (0.56)  | 2.33 (0.48)  | 2.13 (0.54)   | <0.001          |
| <b>Post-bronchodilator<br/>FEV1/FVC ration, %</b> |     | 80.29 (8.31) | 82.22 (5.55) | 65.87 (3.95) | 57.42 (8.95) | 46.37 (7.97) | <0.001          | 83.20 (6.84) | 83.20 (6.84) | 65.76 (4.10) | 58.37 (8.37) | 46.85 (13.42) | <0.001          |
| <b>History of tuberculosis</b>                    |     |              |              |              |              |              |                 |              |              |              |              |               |                 |
|                                                   | Yes | 42 (17.1%)   | 36 (85.7%)   | 3 (7.1%)     | 1 (2.4%)     | 2 (4.8%)     | <i>p</i> =0.001 | 77 (2.4%)    | 75 (97.4%)   | 2 (2.6%)     | 0            | 0             | <i>p</i> =0.792 |
|                                                   | No  | 2421 (82.9%) | 2187 (90.3%) | 155 (6.4%)   | 69 (2.9%)    | 10 (0.4%)    |                 | 3087 (97.6%) | 2966 (96.1%) | 80 (2.6%)    | 35 (1.1%)    | 6 (0.2%)      |                 |

Data are weighted and expressed as number (%) or mean (SE). GOLD stage I (mild COPD): FEV1 ≥80% predicted; GOLD stage II (moderate COPD): FEV1 ≥50% to <80% predicted; GOLD stage III (severe COPD): FEV1 ≥30% to <50% predicted; GOLD stage IV (very severe): FEV1 <30% predicted.

\*Age groups 20–29 years and 30–39 years were combined because of small numbers of GOLD stage III–IV.

†One or more smokers living in the same house or apartment.

COPD: chronic obstructive pulmonary disease; FEV1: forced expiratory volume in 1 s; FVC: forced vital capacity; GOLD: Global Initiative for Chronic Obstructive Lung Disease; PM2•5: particulate matter with a diameter less than 2•5 µm.

Supplementary Table 2: Age-specific and age-standardised prevalence of spirometry-defined COPD in Shanxi Province adult population aged 20 years or older in 2015.

|                 |                         | Prevalence (%) in entire population (95%CI) |           |                  |          |                  |           | Prevalence (%) in never-smokers (95%CI) |            |                  |          |                  |          |
|-----------------|-------------------------|---------------------------------------------|-----------|------------------|----------|------------------|-----------|-----------------------------------------|------------|------------------|----------|------------------|----------|
|                 |                         | Men                                         |           | Women            |          | Total            |           | Men                                     |            | Women            |          | Total            |          |
|                 |                         | Prevalence (%)                              | 95%CI     | Prevalence (%)   | 95%CI    | Prevalence (%)   | 95%CI     | Prevalence (%)                          | 95%CI      | Prevalence (%)   | 95%CI    | Prevalence (%)   | 95%CI    |
| Age (years)     |                         | 9.7%                                        | 8.6~10.9  | 3.9%             | 3.2~4.6  | 6.4%             | 5.8~7.1   | 6.3%                                    | 4.6~8.1    | 4.1%             | 3.4~4.7  | 4.4%             | 3.8~5.0  |
|                 | 20-39                   | 1.7%                                        | 1.0~2.5   | 1.2%             | 0.5~1.9  | 1.5%             | 1.0~2.0   | 2.0%                                    | 0.6~3.4    | 1.4%             | 0.8~2.1  | 1.6%             | 1.0~2.2  |
|                 | 40-49                   | 9.9%                                        | 7.2~12.6  | 3.2%             | 1.9~4.5  | 5.8%             | 4.5~7.1   | 7.1%                                    | 2.6~11.6   | 3.7%             | 2.4~5.0  | 4.2%             | 2.9~5.4  |
|                 | 50-59                   | 13.1%                                       | 10.2~16.1 | 4.6%             | 3.2~5.9  | 7.6%             | 6.2~9.0   | 9.8%                                    | 4.5~15.2   | 5.2%             | 3.8~6.5  | 5.7%             | 4.3~7.0  |
|                 | 60-69                   | 23.0%                                       | 18.6~27.5 | 8.2%             | 5.7~10.7 | 14.5%            | 12.1~17.0 | 15.3%                                   | 8.5~22.1   | 8.8%             | 6.4~11.2 | 9.9%             | 7.6~12.2 |
|                 | ≥70                     | 36.4%                                       | 14.5~58.2 | 5.0%             | 5.5~15.5 | 21.4%            | 8.5~34.4  | 40.0%                                   | 28.0~100.0 | 13.0%            | 1.8~27.9 | 17.9%            | 2.7~33.0 |
|                 | <i>p</i> for trend      | <i>p</i> <0.0001                            |           | <i>p</i> <0.0001 |          | <i>p</i> <0.0001 |           | <i>p</i> <0.0001                        |            | <i>p</i> <0.0001 |          | <i>p</i> <0.0001 |          |
| Resident        |                         | 9.7%                                        | 8.6~10.9  | 3.9%             | 3.2~4.7  | 6.4%             | 5.8~7.1   | 6.6%                                    | 4.9~8.4    | 3.5%             | 2.9~4.2  | 4.2%             | 3.5~4.8  |
|                 | Urban residents         | 9.6%                                        | 8.4~10.8  | 4.0%             | 3.3~4.7  | 6.5%             | 5.8~7.1   | 6.6%                                    | 4.8~8.5    | 3.6%             | 2.9~4.3  | 4.2%             | 3.6~4.9  |
|                 | Rural residents         | 11.4%                                       | 6.8~16.1  | 2.6%             | 0.7~4.5  | 6.1%             | 3.9~8.4   | 6.3%                                    | 0.2~12.5   | 2.6%             | 0.7~4.6  | 3.4%             | 1.4~5.3  |
|                 | <i>p</i> for difference | <i>p</i> =0.422                             |           | <i>p</i> =0.242  |          | <i>p</i> =0.785  |           | <i>p</i> =0.929                         |            | <i>p</i> =0.401  |          | <i>p</i> =0.443  |          |
| Education level |                         | 9.7%                                        | 8.6~10.9  | 3.9%             | 3.2~4.6  | 6.4%             | 5.8~7.1   | 6.6%                                    | 4.9~8.4    | 3.5%             | 2.9~4.2  | 4.2%             | 3.5~4.8  |
|                 | Primary school          | 24.3%                                       | 18.6~30.1 | 8.1%             | 5.6~10.5 | 13.1%            | 10.6~15.6 | 13.5%                                   | 3.9~23.1   | 6.8%             | 4.4~9.1  | 7.5%             | 5.1~9.8  |
|                 | Middle and high school  | 10.7%                                       | 9.1~12.2  | 4.0%             | 3.1~4.9  | 6.9%             | 6.1~7.7   | 8.5%                                    | 5.8~11.1   | 3.9%             | 3.1~4.8  | 4.7%             | 3.9~5.6  |
|                 | College and higher      | 3.6%                                        | 2.3~4.9   | 0.8%             | 0.2~1.5  | 2.2%             | 1.5~3.0   | 3.0%                                    | 1.0~4.9    | 0.7%             | 0.1~1.3  | 1.4%             | 0.6~2.1  |
|                 | <i>p</i> for trend      | <i>p</i> <0.0001                            |           | <i>p</i> <0.0001 |          | <i>p</i> <0.0001 |           | <i>p</i> =0.002                         |            | <i>p</i> <0.0001 |          | <i>p</i> <0.0001 |          |
| Smoking history |                         | 9.7%                                        | 8.6~10.9  | 3.9%             | 3.2~4.6  | 6.4%             | 5.8~7.1   | ..                                      | ..         | ..               | ..       | ..               | ..       |
|                 | Never                   | 6.6%                                        | 4.9~8.4   | 3.5%             | 2.9~4.2  | 4.2%             | 3.5~4.8   | ..                                      | ..         | ..               | ..       | ..               | ..       |
|                 | Former smoker           | 10.5%                                       | 8.9~12.1  | 12.5%            | 4.7~20.3 | 10.6%            | 9.0~12.1  | ..                                      | ..         | ..               | ..       | ..               | ..       |

|                                                            |                  |           |                  |          |                  |           |                 |          |                  |          |                  |          |
|------------------------------------------------------------|------------------|-----------|------------------|----------|------------------|-----------|-----------------|----------|------------------|----------|------------------|----------|
| Current smoker                                             | 15.3%            | 10.6~20.0 | 20.8%            | 3.3~38.4 | 15.8%            | 11.3~20.3 | ..              | ..       | ..               | ..       | ..               | ..       |
| <i>p</i> for trend                                         | <i>p</i> <0.0001 |           | <i>p</i> <0.0001 |          | <i>p</i> <0.0001 |           | ..              | ..       | ..               | ..       | ..               | ..       |
| <b>Smoking exposure (pack years)</b>                       | 9.4%             | 8.2~10.5  | 3.9%             | 3.8~5.1  | 6.3%             | 5.7~6.9   | ..              | ..       | ..               | ..       | ..               | ..       |
| 0                                                          | 17.6%            | 14.9~20.2 | 25.0%            | 9.1~40.9 | 17.8%            | 15.2~20.4 | ..              | ..       | ..               | ..       | ..               | ..       |
| 1~9                                                        | 3.2%             | 1.6~4.8   | 11.1%            | 0.3~21.9 | 3.7%             | 2.1~5.4   | ..              | ..       | ..               | ..       | ..               | ..       |
| 10~19                                                      | 6.3%             | 3.5~9.1   | 11.1%            | 5.0~27.2 | 6.6%             | 3.8~9.3   | ..              | ..       | ..               | ..       | ..               | ..       |
| ≥20                                                        | 6.3%             | 4.7~7.9   | 3.5%             | 2.9~4.2  | 4.2%             | 3.5~4.8   | ..              | ..       | ..               | ..       | ..               | ..       |
| <i>p</i> for trend                                         | <i>p</i> <0.0001 |           | <i>p</i> <0.0001 |          | <i>p</i> <0.0001 |           | ..              | ..       | ..               | ..       | ..               | ..       |
| <b>Smokers living in the home</b>                          | ..               | ..        | ..               | ..       | ..               | ..        | 9.7%            | 8.6~10.9 | 3.9%             | 3.2~4.5  | 6.4%             | 5.8~7.1  |
| 0                                                          | ..               | ..        | ..               | ..       | ..               | ..        | 9.6%            | 8.1~11.1 | 3.2%             | 2.2~4.2  | 6.6%             | 5.7~7.6  |
| 1                                                          | ..               | ..        | ..               | ..       | ..               | ..        | 10.3%           | 8.2~12.3 | 4.2%             | 3.2~5.2  | 6.3%             | 5.3~7.2  |
| ≥2                                                         | ..               | ..        | ..               | ..       | ..               | ..        | 8.3%            | 3.9~12.6 | 5.0%             | 2.2~7.7  | 6.3%             | 3.9~8.7  |
| <i>p</i> for trend                                         | ..               | ..        | ..               | ..       | ..               | ..        | <i>p</i> =0.704 |          | <i>p</i> =0.255  |          | <i>p</i> =0.870  |          |
| <b>Chronic cough during childhood (age≤14 years)</b>       | 9.7%             | 8.5~10.9  | 3.9%             | 3.2~4.6  | 6.4%             | 5.8~7.1   | 6.6%            | 4.9~8.4  | 5.3%             | 4.3~6.2  | 5.6%             | 4.8~6.5  |
| Frequent                                                   | 21.8%            | 10.6~33.1 | 14.4%            | 8.0~20.8 | 16.8%            | 11.1~22.4 | 15.8%           | 2.3~33.8 | 14.5%            | 8.0~21.0 | 14.7%            | 8.7~20.7 |
| Sometimes                                                  | 9.9%             | 5.5~14.3  | 4.7%             | 1.8~7.5  | 7.1%             | 4.5~9.6   | 3.5%            | 1.4~8.4  | 4.8%             | 1.9~7.7  | 4.5%             | 2.0~7.0  |
| Rare                                                       | 9.4%             | 8.2~10.6  | 3.4%             | 2.7~4.1  | 6.0%             | 5.4~6.7   | 6.6%            | 4.8~8.5  | 4.7%             | 3.7~5.7  | 5.3%             | 4.4~6.2  |
| <i>p</i> for trend                                         | <i>p</i> =0.009  |           | <i>p</i> <0.0001 |          | <i>p</i> <0.0001 |           | <i>p</i> =0.176 |          | <i>p</i> <0.0001 |          | <i>p</i> <0.0001 |          |
| <b>History of pneumonia or bronchitis during childhood</b> | 9.1%             | 7.9~10.3  | 3.8%             | 3.1~4.5  | 6.1%             | 5.4~6.8   | 6.6%            | 4.9~8.4  | 3.6%             | 2.9~4.2  | 4.2%             | 3.5~4.8  |
| Yes                                                        | 12.2%            | 6.9~17.6  | 9.9%             | 5.7~14.1 | 10.9%            | 7.6~14.2  | 13.6%           | 3.1~24.2 | 9.5%             | 5.4~13.6 | 10.2%            | 6.4~14.1 |
| No                                                         | 8.9%             | 7.6~10.1  | 3.3%             | 2.6~4.0  | 5.8%             | 5.1~6.4   | 6.0%            | 4.1~7.9  | 3.0%             | 2.3~3.7  | 3.6%             | 2.9~4.3  |
| Unknown                                                    |                  |           |                  |          |                  |           | 7.3%            | 2.3~12.2 | 4.1%             | 2.0~6.1  | 4.8%             | 2.9~6.7  |
| <i>p</i> for difference                                    | <i>p</i> =0.172  |           | <i>p</i> <0.0001 |          | <i>p</i> <0.0001 |           | <i>p</i> =0.139 |          | <i>p</i> <0.0001 |          | <i>p</i> <0.0001 |          |
| <b>Parental history of</b>                                 | 9.7%             | 8.6~10.9  | 3.9%             | 3.2~4.6  | 6.4%             | 5.8~7.1   | 6.6%            | 4.9~8.4  | 3.5%             | 2.9~4.2  | 4.2%             | 3.5~4.8  |

|                                                 |          |           |         |          |          |           |         |           |         |          |         |          |
|-------------------------------------------------|----------|-----------|---------|----------|----------|-----------|---------|-----------|---------|----------|---------|----------|
| respiratory diseases                            |          |           |         |          |          |           |         |           |         |          |         |          |
| History of spirometry test                      | 9.6%     | 8.5~10.8  | 3.9%    | 3.2~4.6  | 6.4%     | 5.8~7.0   | 6.4%    | 4.6~8.1   | 3.6%    | 2.9~4.2  | 4.1%    | 3.5~4.8  |
| Yes                                             | 9.6%     | 8.5~10.8  | 3.9%    | 3.2~4.5  | 6.4%     | 5.7~7.0   | 6.4%    | 4.7~8.2   | 3.5%    | 2.9~4.2  | 4.1%    | 3.5~4.7  |
| No                                              | 9.1%     | 11.2~29.3 | 9.5%    | 4.2~23.2 | 9.4%     | 1.3~20.1  | 0.0%    |           | 9.5%    | 4.2~23.2 | 7.7%    | 3.3~18.7 |
| p for difference (Fisher')                      | p=1.000  |           | p=0.197 |          | p=0.457  |           | p=1.000 |           | p=0.171 |          | p=0.292 |          |
| BMI (kg/m <sup>2</sup> )                        | 9.7%     | 8.6~10.9  | 3.9%    | 3.2~4.6  | 6.4%     | 5.8~7.1   | 6.6%    | 4.9~8.4   | 4.2%    | 3.5~4.8  | 0.042   | 3.5~4.8  |
| <18.5 (underweight)                             | 6.9%     | 0.2~13.6  | 3.9%    | 0.1~7.7  | 5.0%     | 1.6~8.4   | 5.6%    | 6.2~17.3  | 3.3%    | 0.1~6.6  | 0.033   | 0.1~6.6  |
| 18.5-24.9 (normal weight)                       | 11.2%    | 9.4~13.0  | 3.6%    | 2.7~4.5  | 6.7%     | 5.8~7.6   | 7.2%    | 4.6~9.8   | 3.9%    | 3.1~4.8  | 0.039   | 3.1~4.8  |
| 25.0-29.9 (overweight)                          | 8.5%     | 6.8~10.3  | 4.6%    | 3.4~5.8  | 6.4%     | 5.4~7.5   | 6.1%    | 3.4~8.8   | 4.7%    | 3.6~5.8  | 0.047   | 3.6~5.8  |
| ≥30.0(obese)                                    | 8.1%     | 4.7~11.5  | 2.7%    | 0.7~4.7  | 5.4%     | 3.4~7.3   | 6.0%    | 0.1~11.8  | 3.6%    | 1.5~5.7  | 0.036   | 1.5~5.7  |
| p for trend                                     | p=0.114  |           | p=0.393 |          | p=0.594  |           | p=0.937 |           | p=0.384 |          | p=0.594 |          |
| Biomass use                                     | 0.861    | 84.7~87.5 | 0.039   | 3.2~4.6  | 0.4      | 38.7~41.3 | 6.6%    | 4.8~8.4   | 3.6%    | 2.9~4.2  | 4.1%    | 3.5~4.8  |
| Yes                                             | 0.119    | 6.4~17.5  | 0.065   | 2.9~10.1 | 0.088    | 5.7~11.9  | 9.5%    | 0.3~18.8  | 3.6%    | 2.9~4.2  | 3.7%    | 3.0~4.3  |
| No                                              | 0.905    | 89.3~91.7 | 0.037   | 3.0~4.4  | 0.419    | 40.6~43.3 | 6.4%    | 4.6~8.2   | 2.6%    | 1.0~6.2  | 6.0%    | 4.4~7.7  |
| p for difference                                | p<0.0001 |           | p=0.055 |          | p<0.0001 |           | p=0.350 |           | p=1.000 |          | p=0.003 |          |
| Annual mean PM2.5 exposure (µg/M <sup>2</sup> ) | 9.7%     | 8.6~10.9  | 3.9%    | 3.2~4.6  | 6.4%     | 5.8~7.1   | 6.6%    | 4.9~8.4   | 3.5%    | 2.9~4.2  | 4.2%    | 3.5~4.8  |
| <50                                             | 0        | 0         | 0       | 0        | 0        |           | 0.0%    |           | 0.0%    |          | 0.0%    |          |
| 50-74                                           | 9.3%     | 8.1~10.4  | 3.8%    | 3.1~4.6  | 6.3%     | 5.6~6.9   | 6.4%    | 4.6~8.2   | 3.5%    | 2.8~4.2  | 4.1%    | 3.5~4.8  |
| ≥75                                             | 15.2%    | 10.1~20.2 | 4.2%    | 2.1~6.2  | 8.1%     | 5.8~10.3  | 8.8%    | 1.9~15.7  | 3.7%    | 1.7~5.7  | 4.5%    | 2.5~6.5  |
| p for trend                                     | p=0.007  |           | p=0.767 |          | p=0.100  |           | p=0.441 |           | p=0.876 |          | p=0.695 |          |
| History of tuberculosis                         | 9.7%     | 8.6~10.9  | 3.9%    | 3.2~4.6  | 6.5%     | 5.8~7.1   | 6.6%    | 4.9~8.4   | 3.6%    | 2.9~4.2  | 4.2%    | 3.5~4.8  |
| Yes                                             | 14.3%    | 3.2~25.3  | 2.6%    | 1.0~6.2  | 6.7%     | 2.2~11.3  | 10.2%   | 10.2~50.2 | 2.6%    | 1.0~6.2  | 4.6%    | 0.1~9.1  |
| No                                              | 9.7%     | 8.5~10.8  | 3.9%    | 3.2~4.6  | 6.4%     | 5.8~7.1   | 6.5%    | 4.7~8.2   | 3.6%    | 2.9~4.2  | 4.2%    | 3.5~4.8  |
| p for difference                                | p=0.317  |           | p=0.553 |          | p=0.903  |           | p=0.138 |           | p=1.000 |          | p=0.784 |          |





Supplementary Table 3: Multiple-adjusted ORs for COPD associated with risk factors in the general adult population aged 20 years or older in Shanxi Province.

|                              |                        | Entire population    |           |                 |                        |           |                 | Never-smokers        |           |                 |                        |           |                 |
|------------------------------|------------------------|----------------------|-----------|-----------------|------------------------|-----------|-----------------|----------------------|-----------|-----------------|------------------------|-----------|-----------------|
|                              |                        | Age and sex adjusted |           |                 | Multivariable adjusted |           |                 | Age and sex adjusted |           |                 | Multivariable adjusted |           |                 |
|                              |                        | OR                   |           | <i>p</i>        | OR                     |           | <i>p</i>        | OR                   |           | <i>p</i>        | OR                     |           | <i>p</i>        |
| Male sex                     |                        | 3.09                 | 2.44~3.92 | <0.0001         | 2.35                   | 1.66~3.32 | <0.0001         | 2.29                 | 1.59~3.28 | <0.0001         | 2.84                   | 1.88~4.28 | <0.0001         |
| Age                          |                        |                      |           |                 |                        |           |                 |                      |           |                 |                        |           |                 |
|                              | 20-39                  | 1.00                 |           |                 | 1.00                   |           |                 | 1.00                 |           |                 | 1.00                   |           |                 |
|                              | 40-49                  | 0.05                 | 0.02~0.12 | <0.0001         | 0.07                   | 0.03~0.17 | <0.0001         | 0.09                 | 0.02~0.33 | <0.0001         | 0.12                   | 0.03~0.51 | <i>p</i> =0.004 |
|                              | 50-59                  | 0.25                 | 0.11~0.55 | <i>p</i> =0.001 | 0.28                   | 0.12~0.63 | <i>P</i> =0.002 | 0.27                 | 0.08~0.97 | <i>p</i> =0.045 | 0.30                   | 0.08~1.20 | <i>p</i> =0.088 |
|                              | 60-69                  | 0.35                 | 0.16~0.77 | <i>p</i> =0.009 | 0.35                   | 0.16~0.79 | <i>P</i> =0.012 | 0.40                 | 0.11~1.39 | <i>p</i> =0.149 | 0.46                   | 0.19~1.74 | <i>p</i> =0.25  |
|                              | ≥70                    | 0.68                 | 0.31~1.49 | <i>p</i> =0.336 | 0.64                   | 0.26~1.45 | <i>P</i> =0.285 | 0.65                 | 0.18~2.29 | <i>p</i> =0.503 | 0.70                   | 0.18~2.70 | <i>p</i> =0.605 |
|                              | <i>p</i> for trend     | <0.0001              |           |                 | <0.0001                |           |                 | <0.0001              |           |                 | <0.0001                |           |                 |
| Rural residents              |                        | 0.73                 | 0.47~1.13 | <i>p</i> =0.153 | 1.55                   | 0.91~2.62 | <i>P</i> =0.107 | 0.67                 | 0.36~1.27 | <i>p</i> =0.221 | 1.22                   | 0.58~2.55 | <i>p</i> =0.604 |
| Education level              |                        |                      |           |                 |                        |           |                 |                      |           |                 |                        |           |                 |
|                              | Primary school         | 1.00                 |           |                 | 1.00                   |           |                 | 1.00                 |           |                 | 1.00                   |           |                 |
|                              | Middle and high school | 3.41                 | 2.15~5.41 | <0.0001         | 3.61                   | 2.21~5.88 | <0.0001         | 3.27                 | 1.64~6.54 | <i>p</i> =0.001 | 4.32                   | 2.04~9.15 | <0.0001         |
|                              | College and higher     | 2.20                 | 1.48~3.27 | <0.0001         | 2.17                   | 1.44~3.26 | <0.0001         | 2.66                 | 1.48~4.78 | <i>p</i> =0.001 | 3.02                   | 1.62~5.62 | <i>p</i> =0.001 |
|                              | <i>p</i> for trend     | <0.0001              |           |                 | <0.0001                |           |                 | <i>p</i> =0.002      |           |                 | <i>p</i> =0.001        |           |                 |
| Smoking exposure (pack/year) |                        |                      |           |                 |                        |           |                 |                      |           |                 |                        |           |                 |
|                              | 0                      | 1.00                 |           |                 | 1.00                   |           |                 |                      |           |                 |                        |           |                 |

|                                                     |                    |                 |           |                 |                 |             |                 |                 |           |         |                 |           |                 |
|-----------------------------------------------------|--------------------|-----------------|-----------|-----------------|-----------------|-------------|-----------------|-----------------|-----------|---------|-----------------|-----------|-----------------|
|                                                     | 1~9                | 0.48            | 0.35~0.68 | <0.0001         | 0.58            | 0.405~0.836 | <i>p</i> =0.003 |                 |           |         |                 |           |                 |
|                                                     | 10~19              | 0.43            | 0.25~0.72 | <i>p</i> =0.001 | 0.46            | 0.266~0.789 | <i>p</i> =0.005 |                 |           |         |                 |           |                 |
|                                                     | ≥20                | 0.71            | 0.45~1.11 | <i>p</i> =0.132 | 0.78            | 0.489~1.241 | <i>p</i> =0.293 |                 |           |         |                 |           |                 |
|                                                     | <i>p</i> for trend | <0.0001         |           |                 | <i>p</i> =0.004 |             |                 |                 |           |         |                 |           |                 |
| Smokers living in the home                          |                    |                 |           |                 |                 |             |                 |                 |           |         |                 |           |                 |
|                                                     | 0                  | 1.00            |           |                 | 1.00            |             |                 | 1.00            |           |         | 1.00            |           |                 |
|                                                     | 1                  | 0.86            | 0.55~1.34 | P=0.501         | 1.09            | 0.67~1.77   | <i>p</i> =0.722 | 0.60            | 0.33~1.10 | P=0.1   | 0.62            | 0.32~1.19 | P=0.15          |
|                                                     | ≥2                 | 1.08            | 0.68~1.69 | P=0.755         | 1.12            | 0.69~1.82   | <i>p</i> =0.637 | 0.74            | 0.40~1.34 | P=0.316 | 0.73            | 0.39~1.38 | P=0.336         |
|                                                     | <i>p</i> for trend | <i>p</i> =0.186 |           |                 | <i>p</i> =0.891 |             |                 | <i>p</i> =0.215 |           |         | <i>p</i> =0.334 |           |                 |
| Chronic cough during childhood (age≤14 years)       |                    |                 |           |                 |                 |             |                 |                 |           |         |                 |           |                 |
|                                                     | Frequent           | 1.00            |           |                 | 1.00            |             |                 | 1.00            |           |         | 1.00            |           |                 |
|                                                     | Sometimes          | 4.68            | 2.96~7.39 | <0.0001         | 5.40            | 3.32~8.77   | <0.0001         | 5.81            | 3.40~9.93 | <0.0001 | 5.05            | 2.76~9.26 | <0.0001         |
|                                                     | Rare               | 1.29            | 0.83~2.00 | 0.264           | 1.29            | 0.81~2.05   | <i>p</i> =0.294 | 1.37            | 0.72~2.61 | 0.332   | 1.20            | 0.60~2.41 | <i>p</i> =0.613 |
|                                                     | <i>p</i> for trend | <0.0001         |           |                 | <0.0001         |             |                 | <0.0001         |           |         | <0.0001         |           |                 |
| History of pneumonia or bronchitis during childhood |                    | 2.00            | 1.26~3.18 | <i>p</i> =0.003 | 1.48            | 0.87~2.54   | <i>p</i> =0.152 | 3.28            | 1.77~6.06 | <0.0001 | 2.60            | 1.24~5.44 | <i>p</i> =0.011 |
